# Supplementary material
Source: publisher figshare collection journal article supplement (https://acs.figshare.com/ndownloader/files/9732172)
Supplement: Supplementary file 1 [file 9732172]

**Catalyzing cascade production of methyl levulinate from polysaccharides using  
heteropolyacids  $H_nPW_{11}MO_{39}$  with Brønsted/Lewis acidic sites**

*Xueyan Zhang,<sup>[a]</sup> † Yue Li,<sup>[a]</sup> † Lifang Xue,<sup>[a]</sup> † Shengtian Wang,<sup>[a]</sup> † Xiaohong  
Wang,<sup>[a]</sup> \* † Zijiang Jiang,<sup>[b]</sup> \*\* †*

*<sup>[a]</sup> † Key Lab of Polyoxometalate Science of Ministry of Education, Faculty of  
Chemistry, Northeast Normal University, No. 5268, Renmin street, Changchun  
130024 (P. R. China number 5268), E-mail address: Zhangxy147@nenu.edu.cn,*

*<sup>[a]</sup> † Key Lab of Polyoxometalate Science of Ministry of Education, Faculty of  
Chemistry, Northeast Normal University, No. 5268, Renmin street, Changchun  
130024 (P. R. China), E-mail address: Liy225@nenu.edu.cn*

*<sup>[a]</sup> † Key Lab of Polyoxometalate Science of Ministry of Education, Faculty of  
Chemistry, Northeast Normal University, No. 5268, Renmin street, Changchun  
130024 (P. R. China), E-mail address: Xuelf107@nenu.edu.cn*

*<sup>[a]</sup> † Center of analysis and measurement, Northeast Normal University, No. 5268,  
Renmin street, Changchun 130024 (P. R. China), E-mail address:  
Wangst706@nenu.edu.cn*

*<sup>[a]</sup> \* † Key Lab of Polyoxometalate Science of Ministry of Education, Faculty of  
Chemistry, Northeast Normal University, No. 5268, Renmin street, Changchun  
130024 (P. R. China), E-mail address: wangxh665@nenu.edu.cn*

<sup>[b]\*\*</sup> † Changchun Institute of Applied Chemistry, Chinese Academy of Sciences,  
National Analytical Research Center of Electrochemistry and Spectroscopy, No.  
5625, Renmin street, Changchun 130024 (P. R. China) Tel.: + 86- 431-85262452;  
E-mail address: zjjiang@ciac.ac.cn

Supplementary figure captions:

**Fig. S1** The XRD patterns of the cellulose.

**Fig. S2** The solubility of HPWTi in methanol as being treated at 200 °C for different time.

**Fig. S3** The IR (a) and UV-Vis spectrum (b) of reaction mixture after centrifugation for HPWTi catalysis.

**Fig. S4** FTIR spectra of the fresh HPWTi (a) and recovered one (b).

**Fig. S5**  $^{31}\text{P}$  MAS NMR spectra of the fresh HPWTi (a) and recovered one (b).

Supplementary scheme captions:

**Scheme S1** The secondary structure of HPWTi and probable for loss its crystal water.

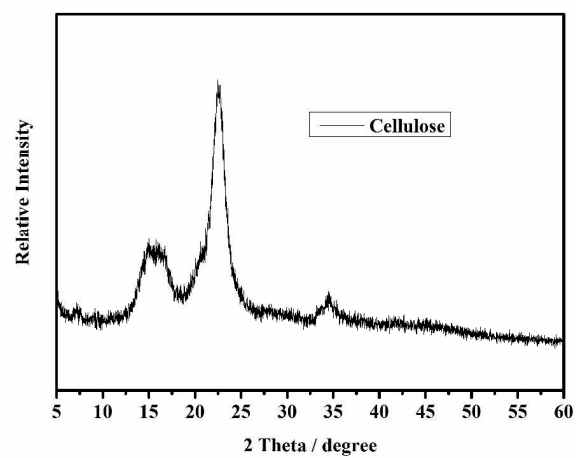

**Fig. S1** The XRD patterns of the cellulose.

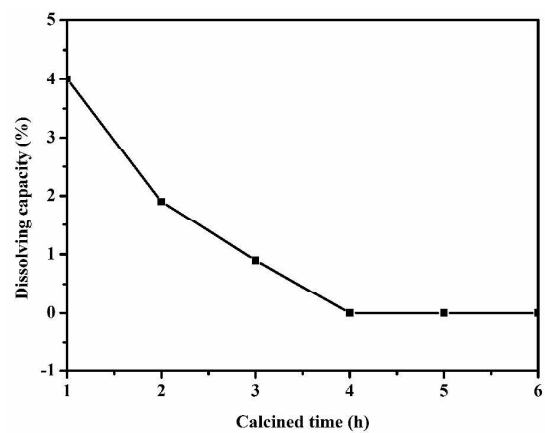

**Fig. S2** The solubility of HPWTi in methanol as being treated at 200 °C for different time.

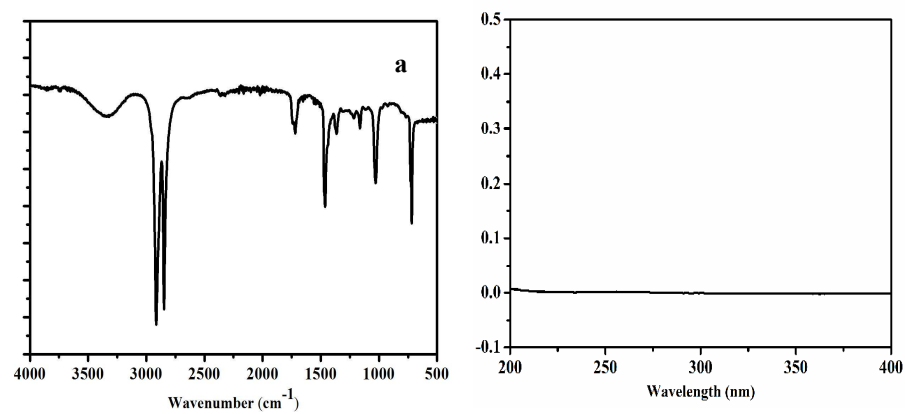

**Fig. S3** The IR (a) and UV-Vis spectrum (b) of reaction mixture after centrifugation for HPWTi catalysis.

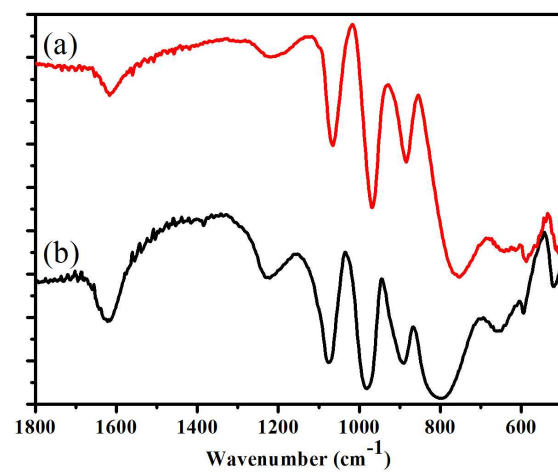

**Fig. S4** FTIR spectra of the fresh HPWTi (a) and recovered one (b).

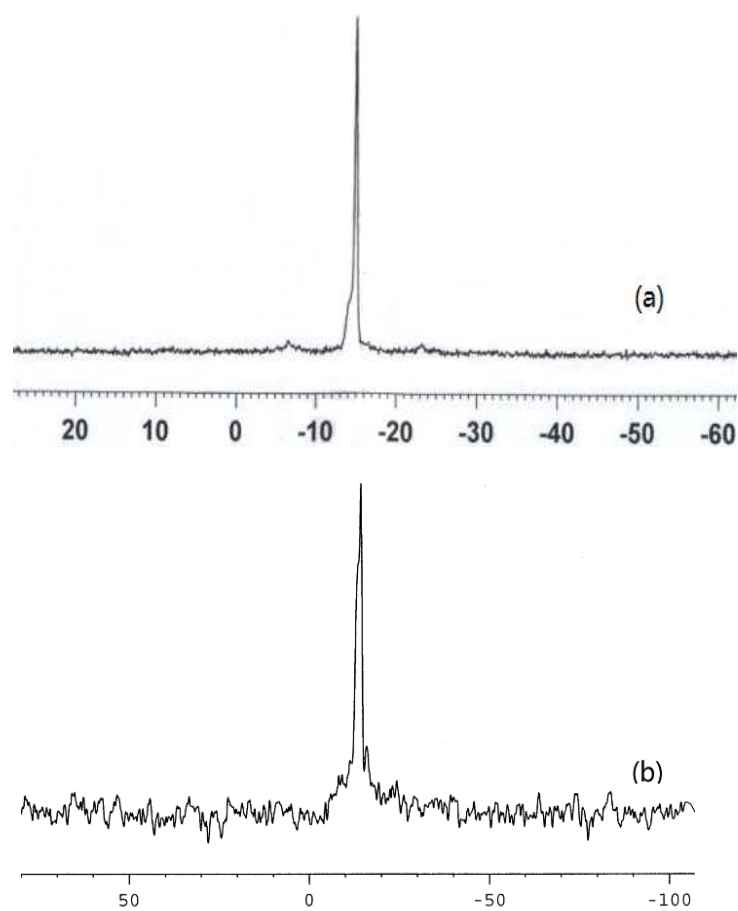

**Fig. S5**  $^{31}\text{P}$  MAS NMR spectra of the fresh HPWTi (a) and recovered one (b).



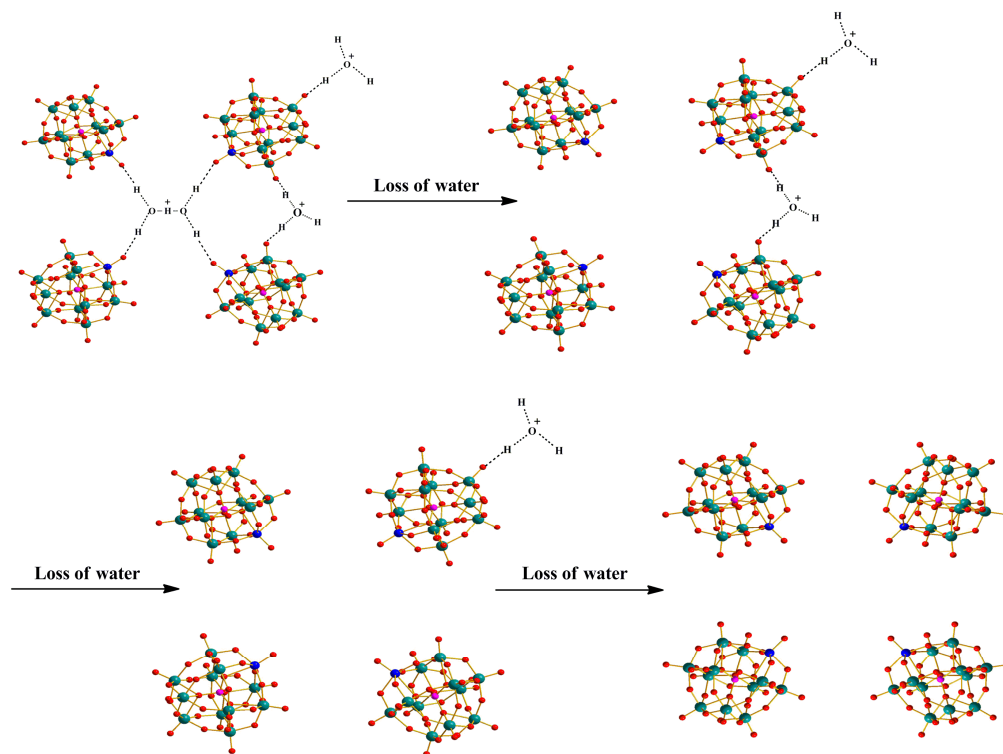

**Scheme S1** The secondary structure of HPWTi and probable for loss its crystal water.
